# Supplementary material for: Enhanced luminescence properties of Ca1+xSr2−xAl2O6:Eu3+ (0 ≤ x ≤ 1) red phosphors based on composition modulation
Source: Royal Society of Chemistry journal article supplement (doi:10.1039/d1ra01291f), 2021-01-01
Supplement: d1ra01291f1.pdf [file d1ra01291f1.pdf]

## Supporting information

### Enhanced luminescence properties of $\text{Ca}_{1+x}\text{Sr}_{2-x}\text{Al}_2\text{O}_6:\text{Eu}^{3+}$ ( $0 \leq x \leq 1$ ) red phosphors based on composition modulation

Biao Shen, Jianghang Xu, Qinan Mao\*, Jiasong Zhong\*

College of Materials and Environmental Engineering, Hangzhou Dianzi University, Hangzhou  
310018, China

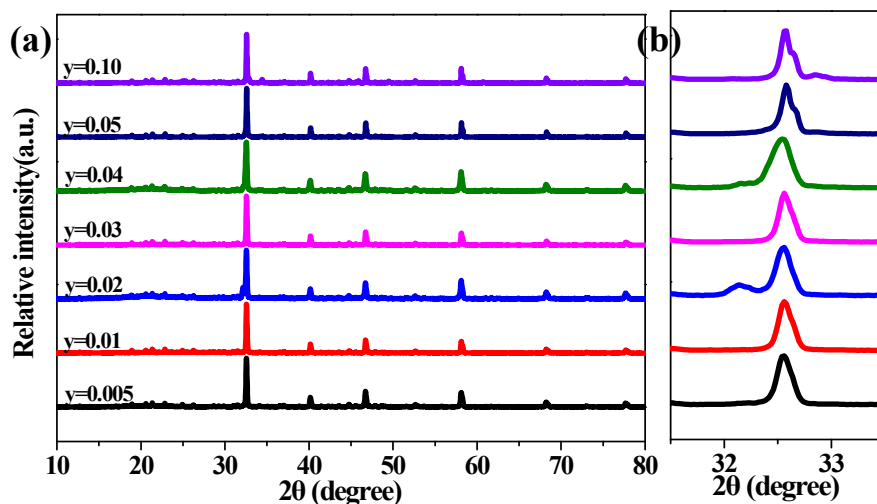

**Fig.S1** (a) XRD patterns of  $\text{CaSr}_2\text{Al}_2\text{O}_6:\text{yEu}^{3+}$  ( $y = 0.005, 0.01, 0.02, 0.03, 0.04, 0.05$  and  $0.10$ ) samples and (b) the corresponding enlarged XRD patterns in the range of  $31.5^\circ$  to  $33.5^\circ$ .

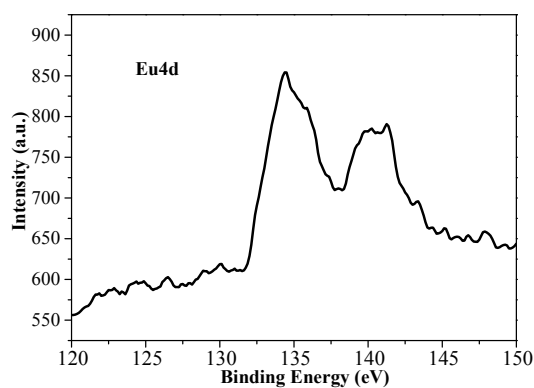

**Fig. S2** The Eu4d X-ray photoelectron spectrum of the  $\text{CaSr}_2\text{Al}_2\text{O}_6:\text{Eu}^{3+}$  sample.

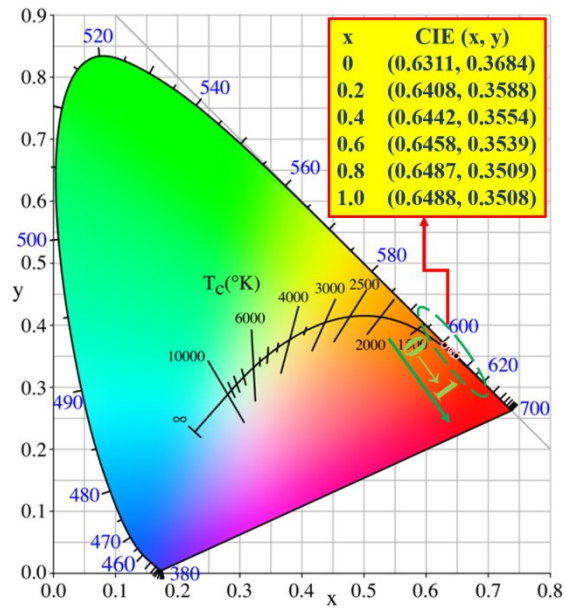

**Fig.S3** The CIE chromaticity diagram of  $\text{Ca}_{1+x}\text{Sr}_{2-x}\text{Al}_2\text{O}_6:0.02\text{Eu}^{3+}$  ( $x = 0, 0.2, 0.4, 0.6, 0.8$  and  $1.0$ ) samples.

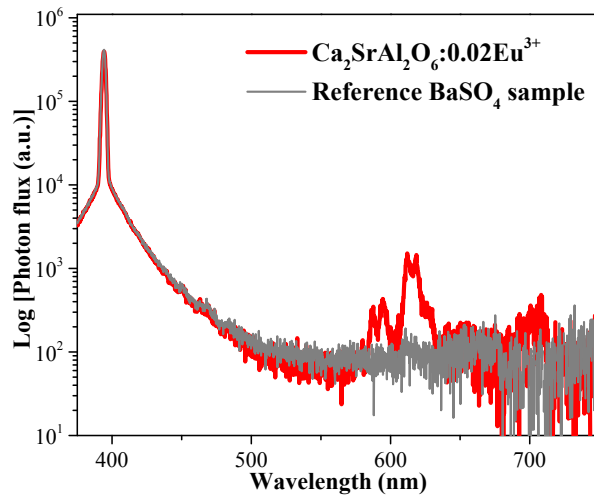

**Fig.S4** Excitation and emission spectra of the  $\text{Ca}_2\text{SrAl}_2\text{O}_6:0.02\text{Eu}^{3+}$  and reference sample.

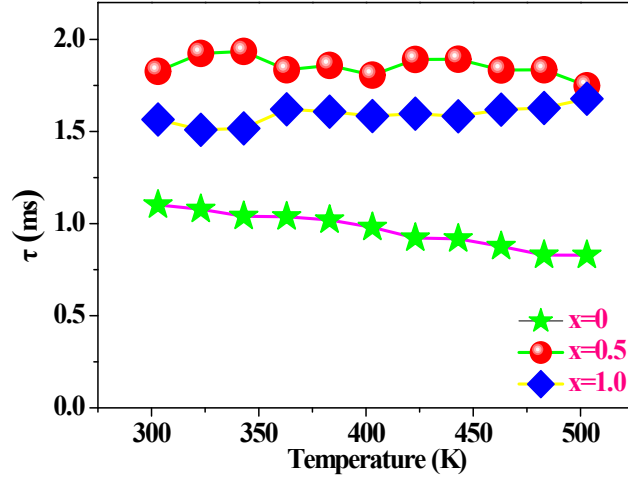

Fig.S5 The temperature dependent luminous lifetimes of  $\text{Ca}_{1+x}\text{Sr}_{2-x}\text{Al}_2\text{O}_6:0.02\text{Eu}^{3+}$  phosphors from 303 K to 503 K.

Table S1 Main bond lengths (Å) for  $\text{Ca}_2\text{SrAl}_2\text{O}_6$  and  $\text{CaSr}_2\text{Al}_2\text{O}_6$ .

| Bond lengths (Å) for $\text{Ca}_2\text{SrAl}_2\text{O}_6$ |            |        |            | Bond lengths (Å) for $\text{CaSr}_2\text{Al}_2\text{O}_6$ |            |            |            |
|-----------------------------------------------------------|------------|--------|------------|-----------------------------------------------------------|------------|------------|------------|
| Bond                                                      | Length (Å) | Bond   | Length (Å) | Bond                                                      | Length (Å) | Bond       | Length (Å) |
| Ca1-O6                                                    | 2.344      | Ca5-O1 | 2.966      | Ca1-O6                                                    | 2.373      | Sr3/Ca5-O1 | 2.833      |
| Ca2-O5                                                    | 2.378      | Ca5-O2 | 2.536      | Ca2-O5                                                    | 2.393      | Sr3/Ca5-O2 | 2.640      |
| Ca3-O4                                                    | 2.378      | Ca5-O3 | 2.362      | Ca3-O4                                                    | 2.375      | Sr3/Ca5-O3 | 2.423      |
| Ca3-O3                                                    | 2.388      | Ca5-O4 | 2.303      | Ca3-O3                                                    | 2.387      | Sr3/Ca5-O4 | 2.359      |
| Sr2/Ca4-O1                                                | 2.577      | Ca5-O6 | 2.316      | Sr2/Ca4-O1                                                | 2.659      | Sr3/Ca5-O6 | 2.625      |
| Sr2/Ca4-O2                                                | 2.953      | Ca5-O6 | 2.547      | Sr2/Ca4-O2                                                | 2.953      | Sr3/Ca5-O6 | 2.723      |
| Sr2/Ca4-O2                                                | 2.467      | Al1-O1 | 1.762      | Sr2/Ca4-O2                                                | 2.871      | Sr3/Ca5-O6 | 2.372      |
| Sr2/Ca4-O3                                                | 2.894      | Al1-O2 | 1.782      | Sr2/Ca4-O3                                                | 2.819      | Al1-O1     | 1.747      |
| Sr2/Ca4-O3                                                | 2.486      | Al1-O5 | 1.764      | Sr2/Ca4-O3                                                | 2.590      | Al1-O2     | 1.762      |
| Sr2/Ca4-O4                                                | 2.836      | Al1-O6 | 1.740      | Sr2/Ca4-O4                                                | 2.844      | Al1-O5     | 1.761      |
| Sr2/Ca4-O5                                                | 2.340      | Al2-O1 | 1.732      | Sr2/Ca4-O5                                                | 2.394      | Al1-O6     | 1.737      |
| Sr2/Ca4-O5                                                | 2.769      | Al2-O2 | 1.732      | Sr2/Ca4-O5                                                | 2.871      | Al2-O1     | 1.749      |
| Sr1-O1                                                    | 2.622      | Al2-O3 | 1.738      | Sr1-O1                                                    | 2.641      | Al2-O2     | 1.764      |
| Sr1-O4                                                    | 2.716      | Al2-O4 | 1.746      | Sr1-O4                                                    | 2.737      | Al2-O3     | 1.751      |
| Sr1-O5                                                    | 2.846      |        |            | Sr1-O5                                                    | 2.811      | Al2-O4     | 1.768      |
